# Supplementary material
Source: PubMed Central journal article supplement (PMC9487387)
Supplement: ERR_0057-2012_Disclosure.pdf [file ERR_0057-2012_Disclosure.pdf]

**P. Chanez** has provided consultancy services for Almirall, BI, Centocor, GSK, MSD, AZ, Novartis, Teva, Chiesi, and Schering Plough; served on advisory boards for Almirall, BI, Centocor, GSK, AZ, Novartis, Teva, Chiesi, Schering Plough and MSD; received lecture fees from Almirall, BI, Centocor, GSK, AZ, Novartis, Teva, Chiesi, Schering Plough and MSD; and received industry-sponsored grants from Almirall, BI, Centocor, GSK, AZ, Novartis, Teva, Chiesi and Schering Plough.
